# Supplementary figures and images for: Facile synthesis of dual-morphological MgCo2O4 with remarkable performance for pseudosupercapacitors
Source: Royal Society of Chemistry journal article supplement (doi:10.1039/d2ma00889k), 2022-11-21

This is our real data tested by phone

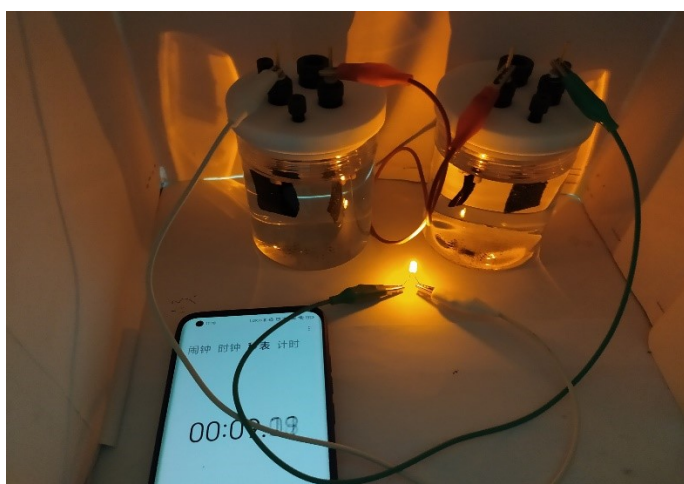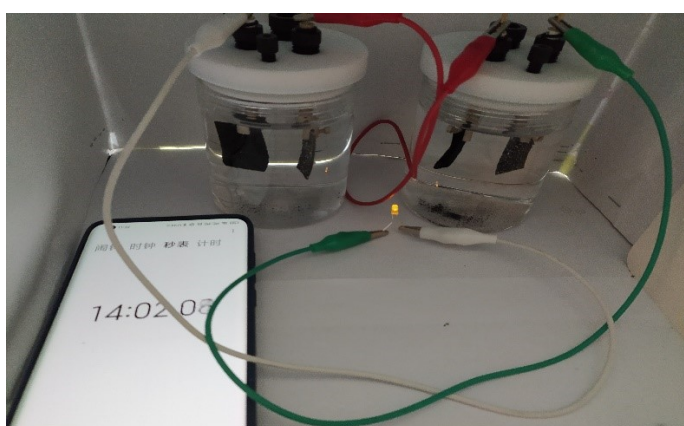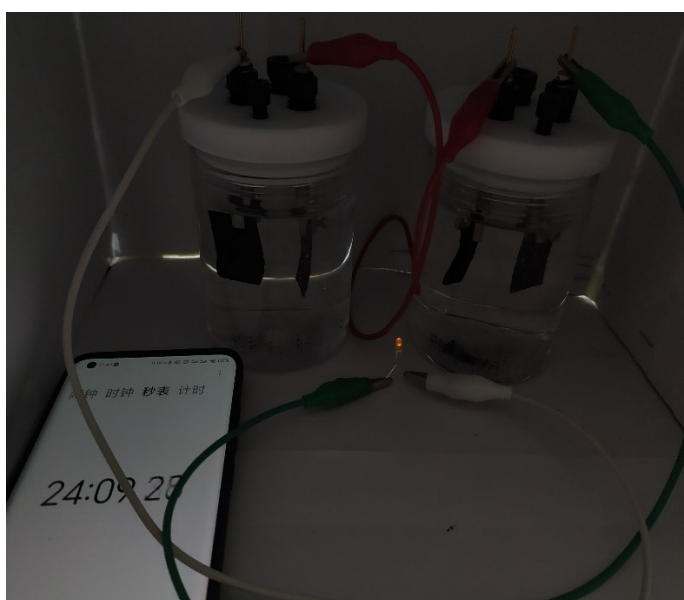

Supplement: d2ma00889k1.pdf [file d2ma00889k1.pdf]
